# Supplementary material for: Tetrodotoxin for Chemotherapy-Induced Neuropathic Pain: A Randomized, Double-Blind, Placebo-Controlled, Parallel-Dose Finding Trial
Source: PubMed Central journal article supplement (PMC8064362; doi:10.3390/toxins13040235), 2021-03-25
Supplement: toxins-13-00235-s001.pdf [file toxins-13-00235-s001.pdf]

---

# **Supplementary Materials: Tetrodotoxin for Chemotherapy-Induced Neuropathic Pain: A Randomized, Double-Blind, Placebo-Controlled, Parallel-Dose Finding Trial**

Samuel A. Goldlust, Mojgan Kavooosi, Jennifer Nezzar, Mehran Kavooosi, Walter Korz and Kenneth Deck

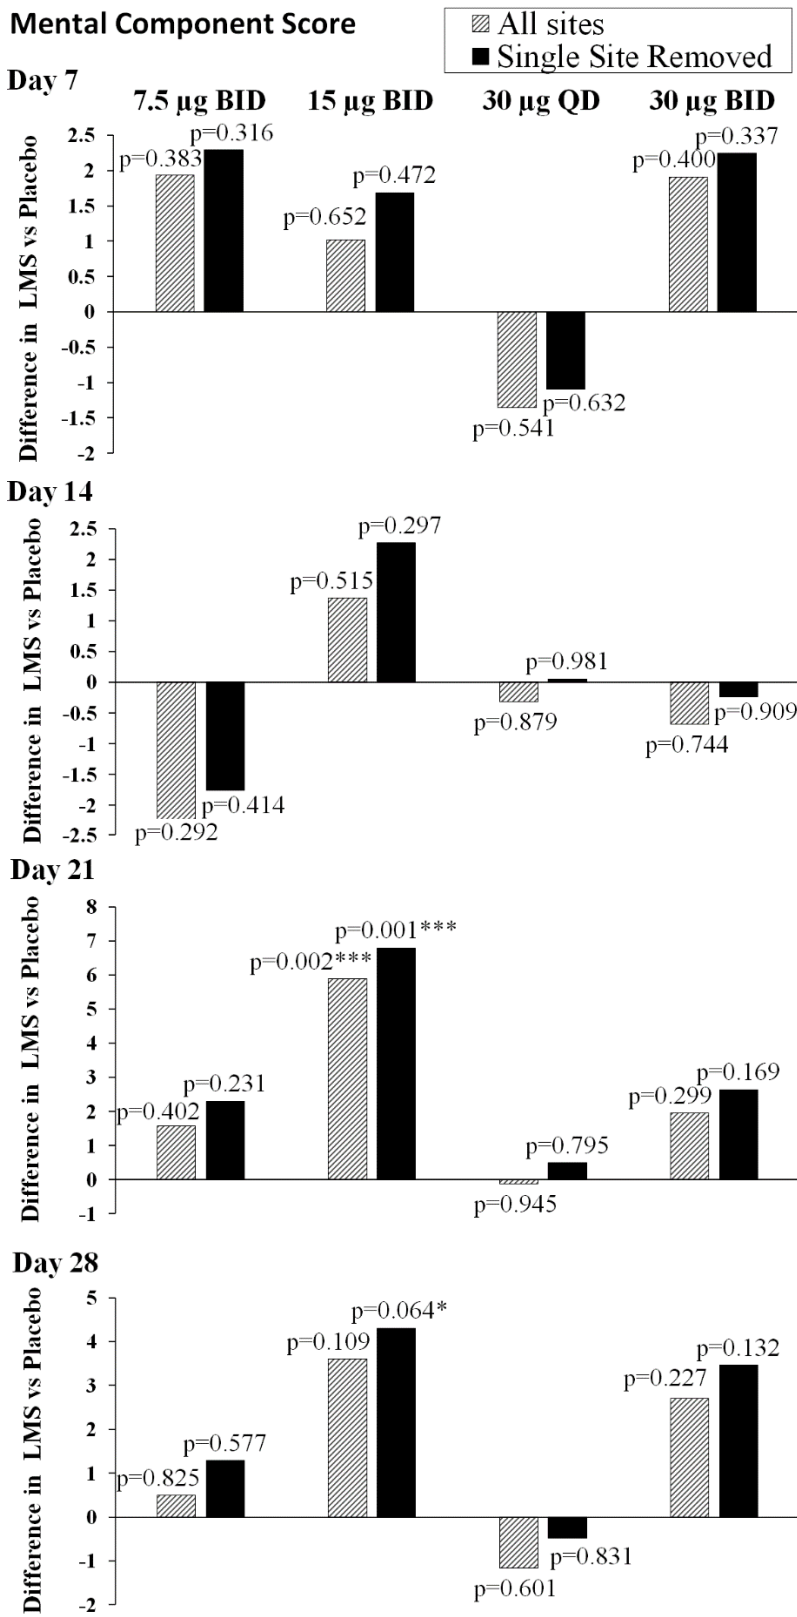

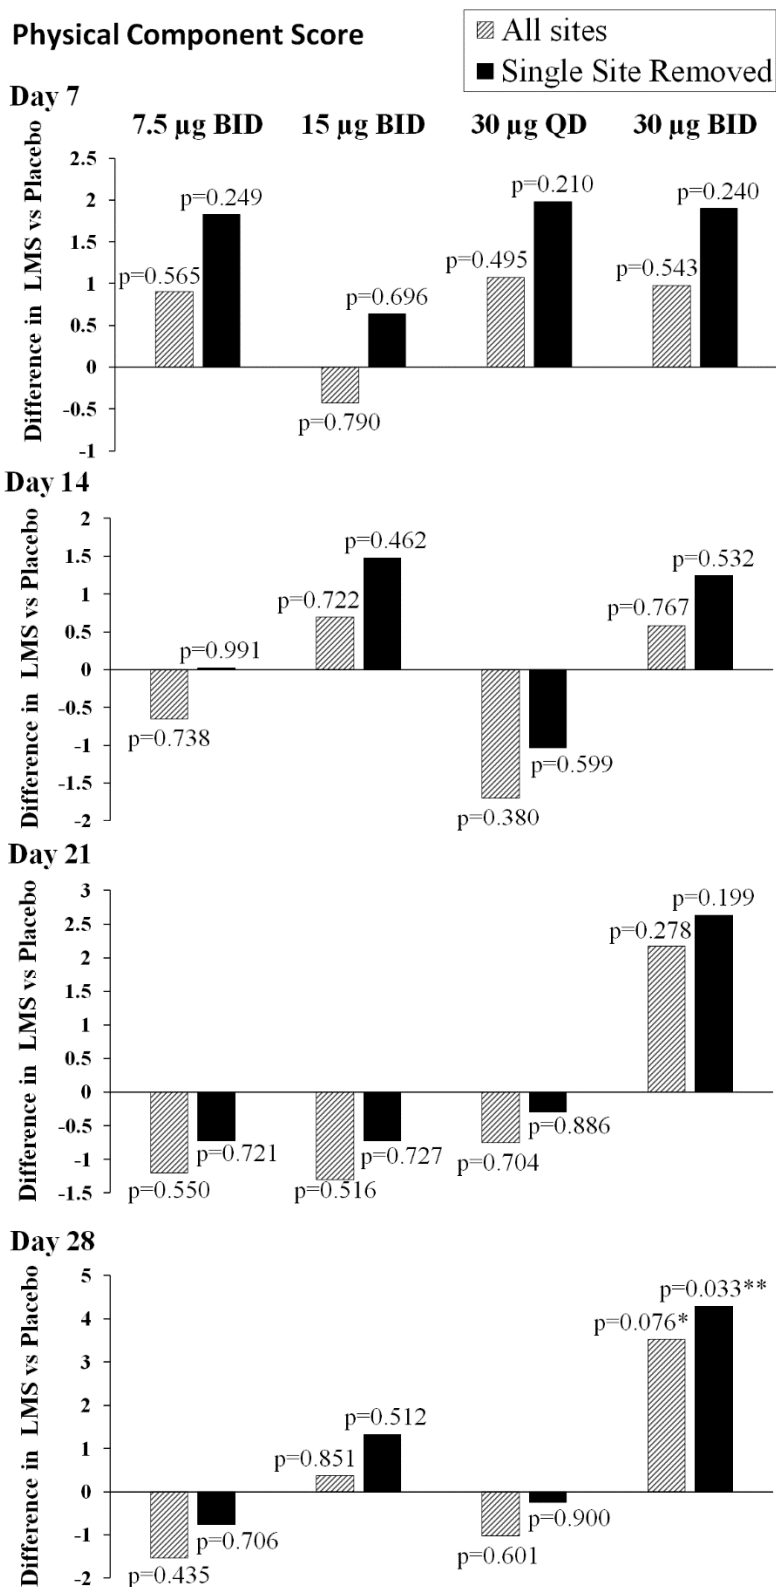

### Mental Health Score

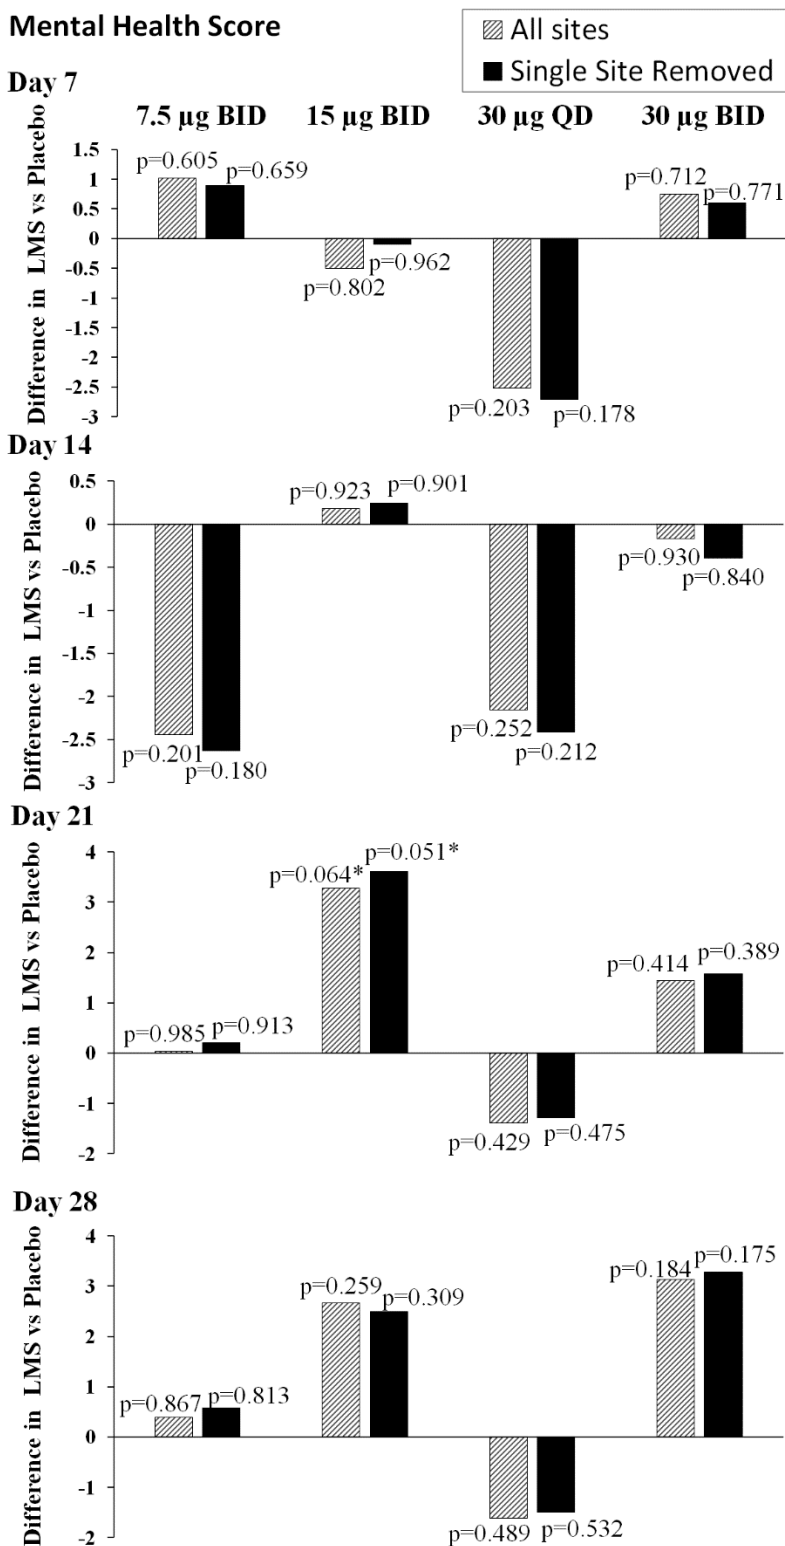

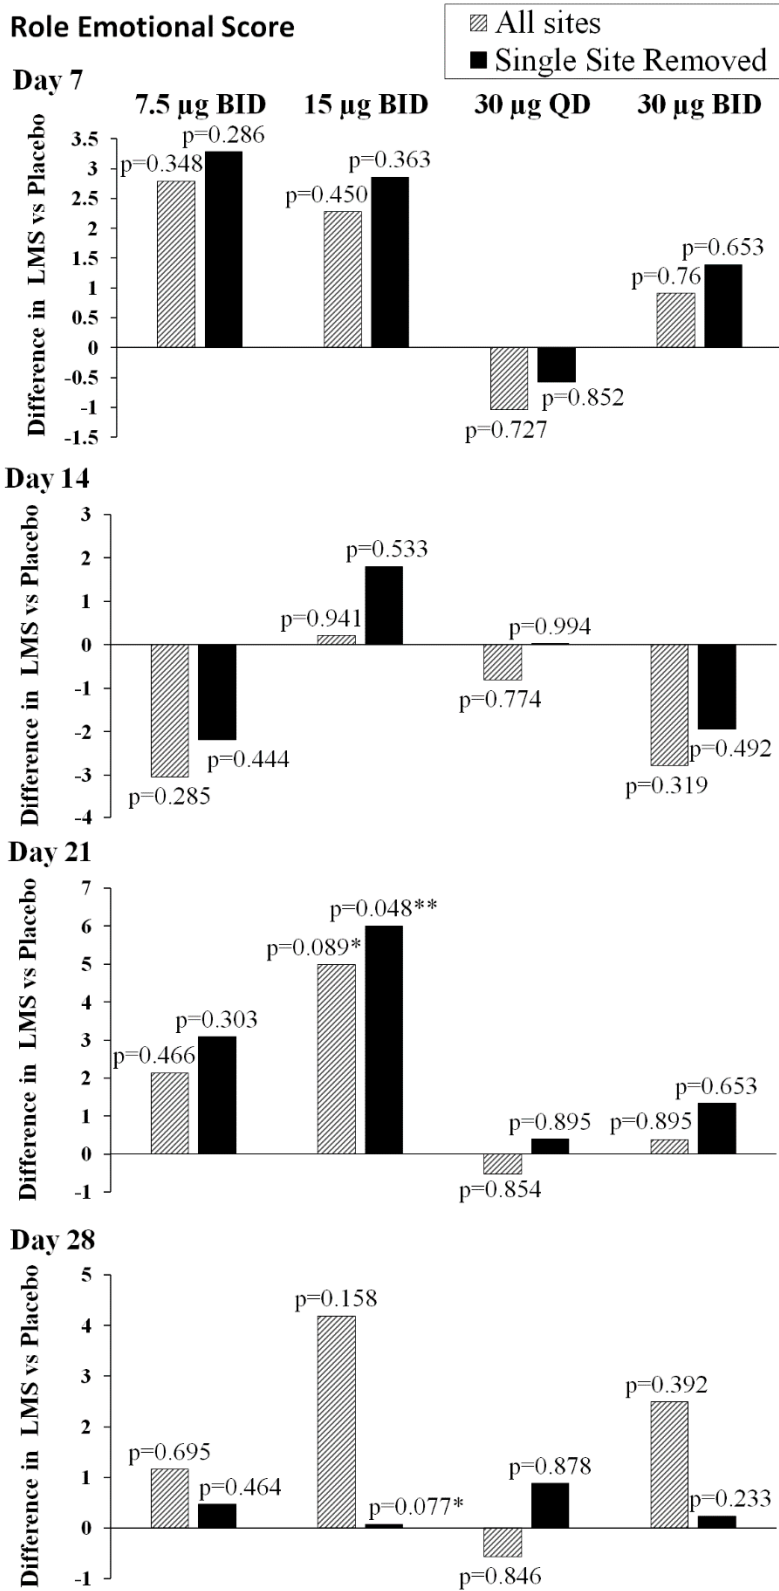

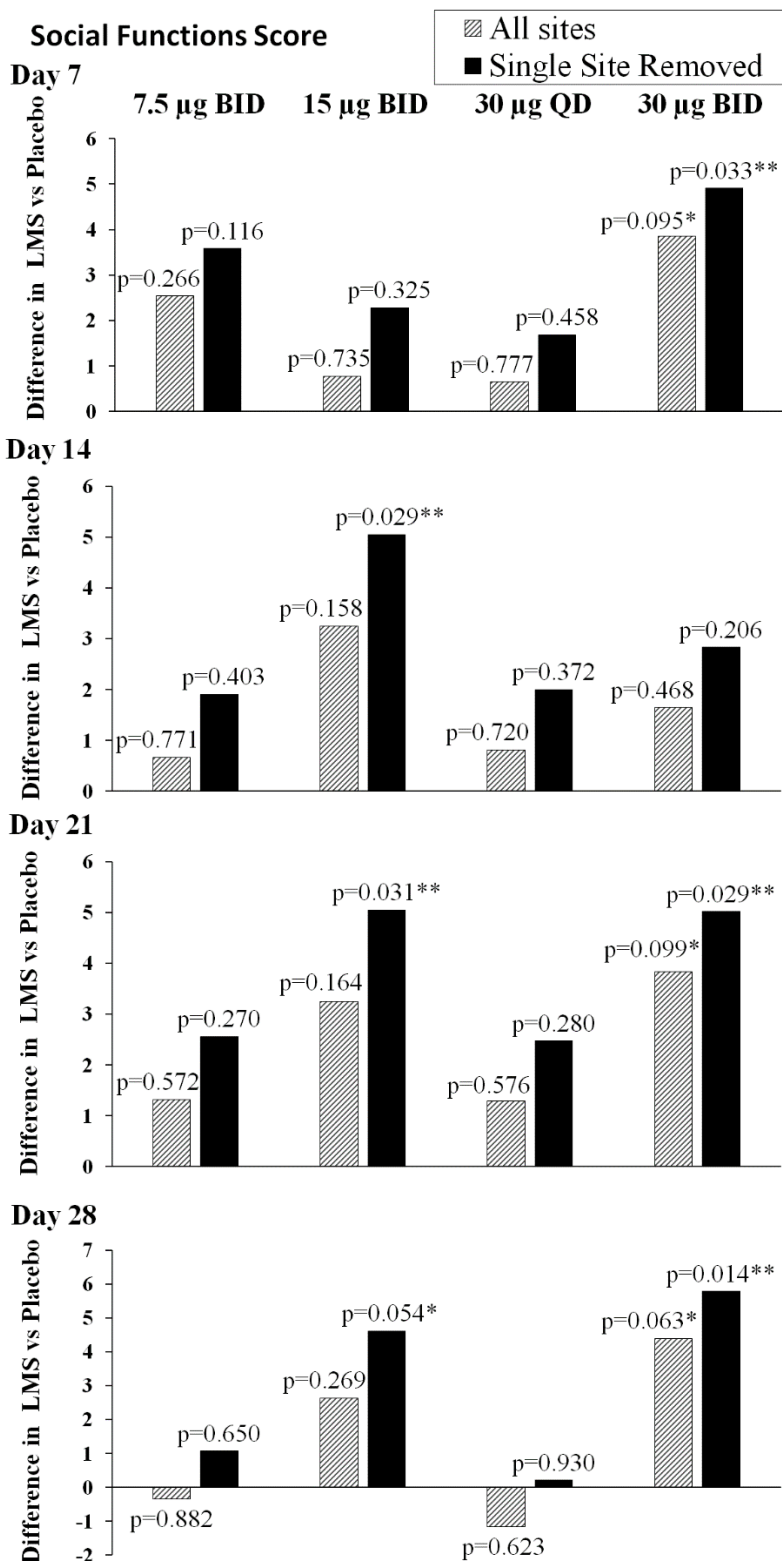

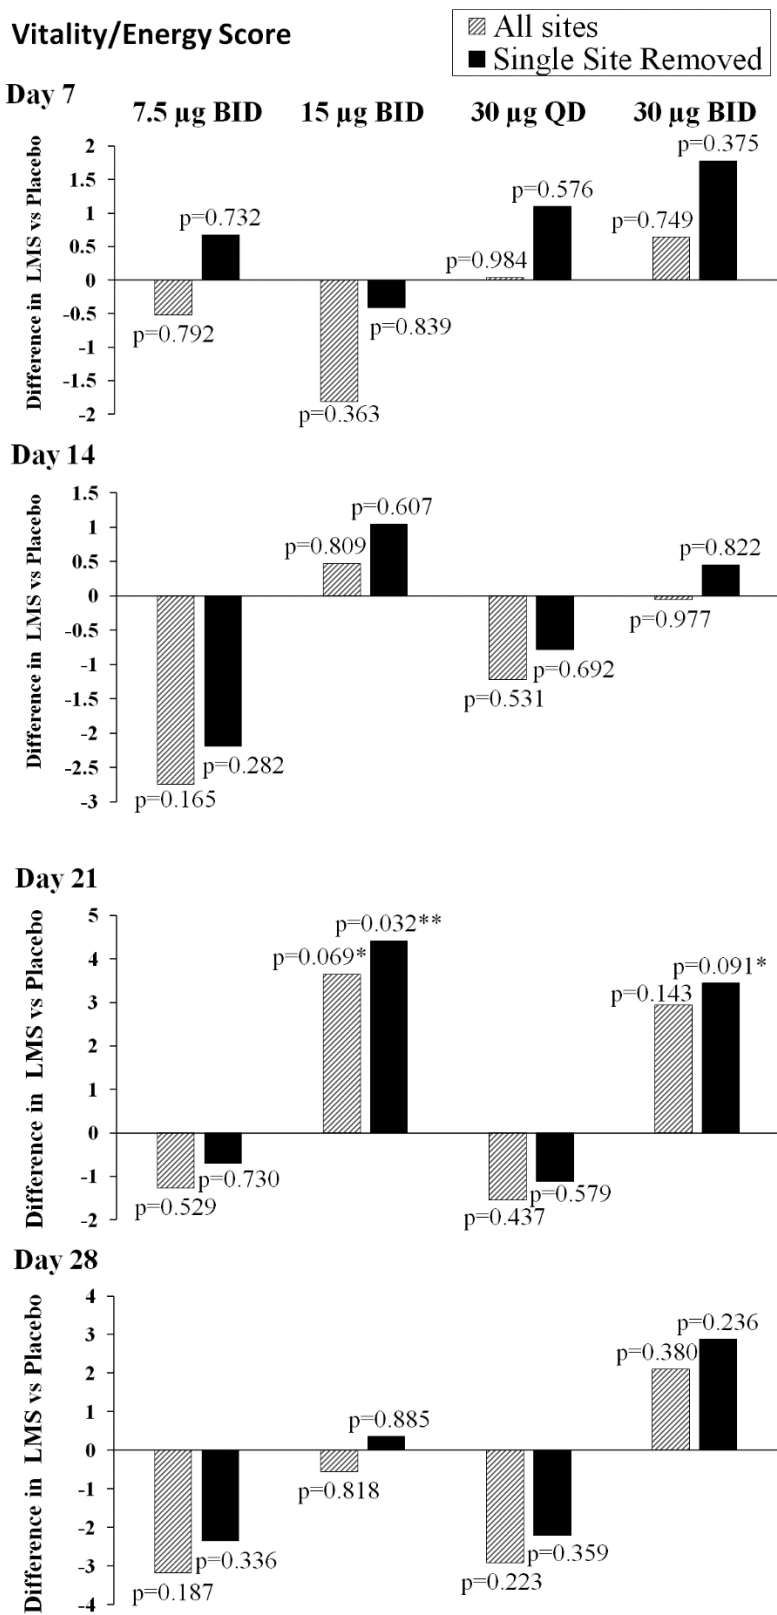

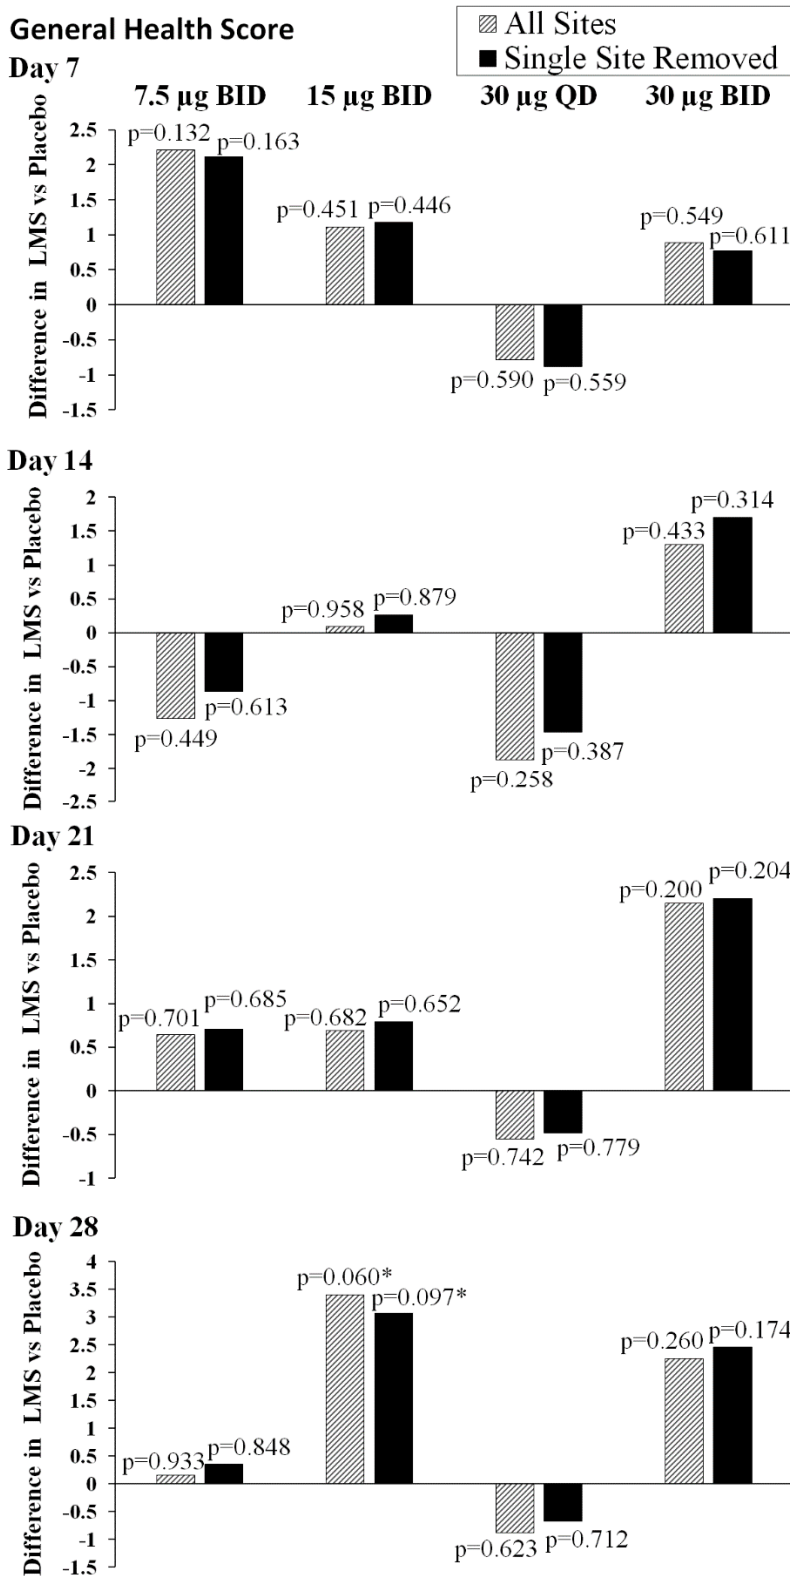



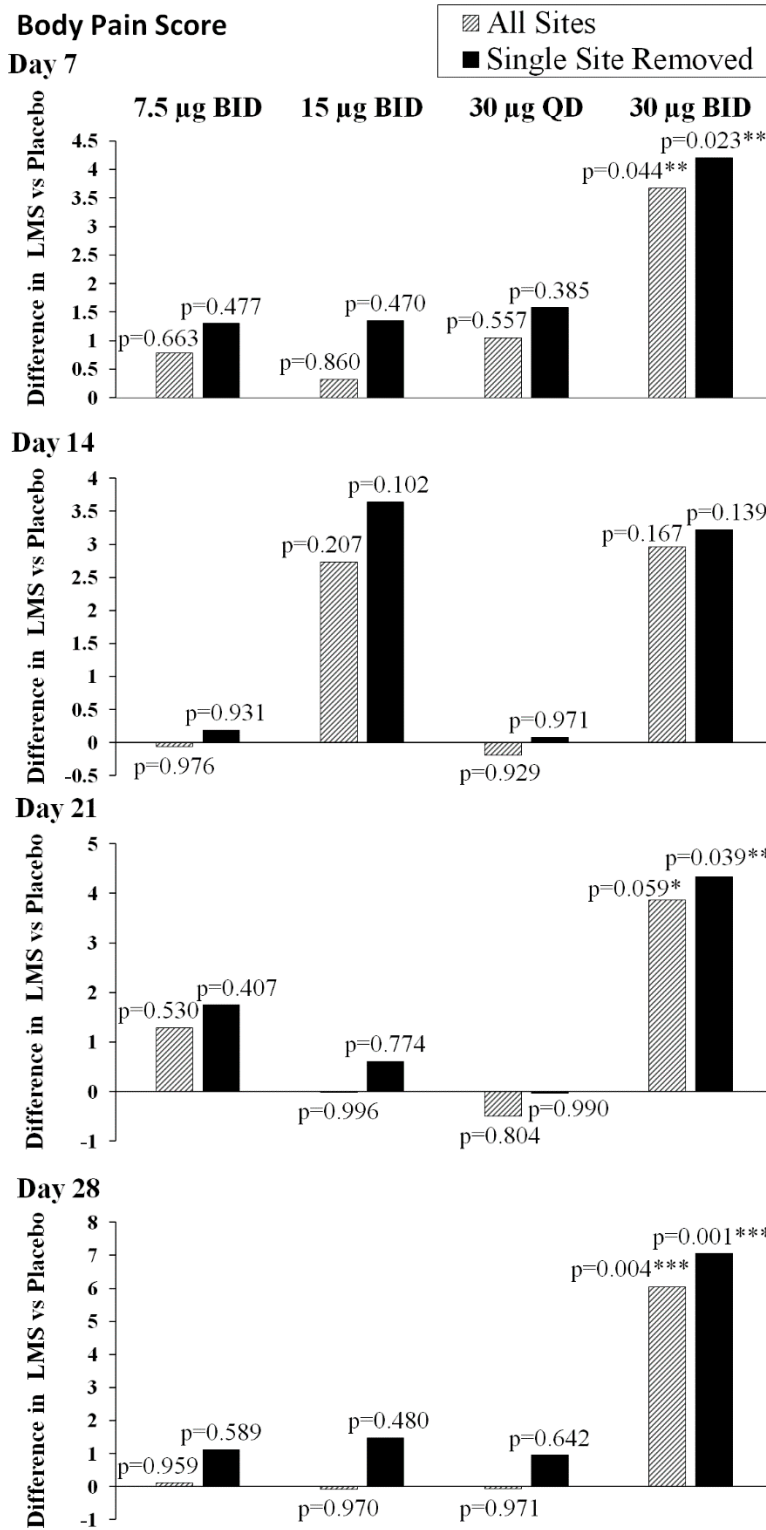

### Role Physical Score

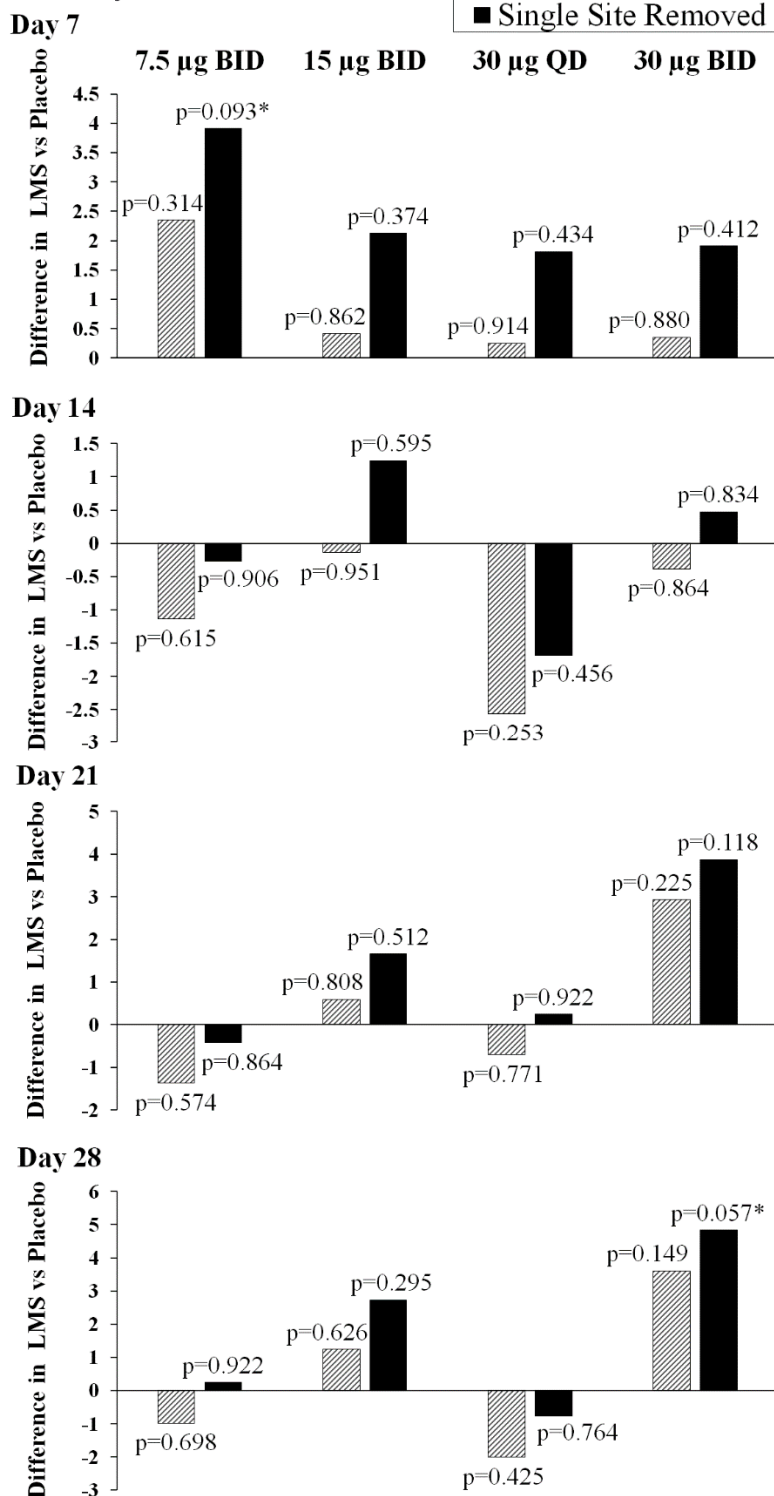

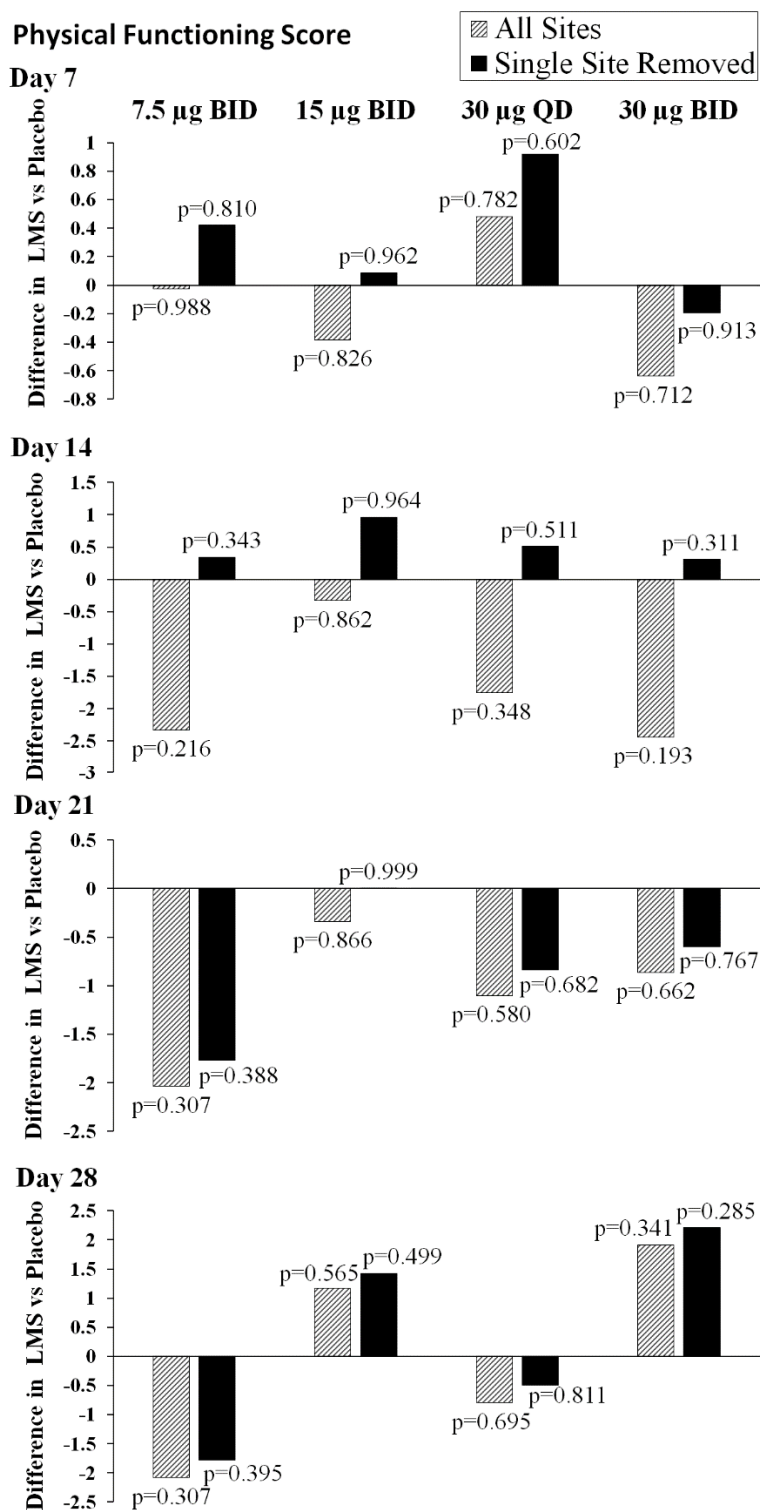

**Figure S1.** SF-36 Secondary Outcome Measures. The least squares mean (LMS) differences (treatment—placebo) from baseline to Day 7, Day 14, Day 21, and Day 28 are shown. *P*-values for the difference in means are shown with \* indicates  $p < 0.1$ , \*\* indicates  $p < 0.05$ , and \*\*\* indicates  $p < 0.01$ .

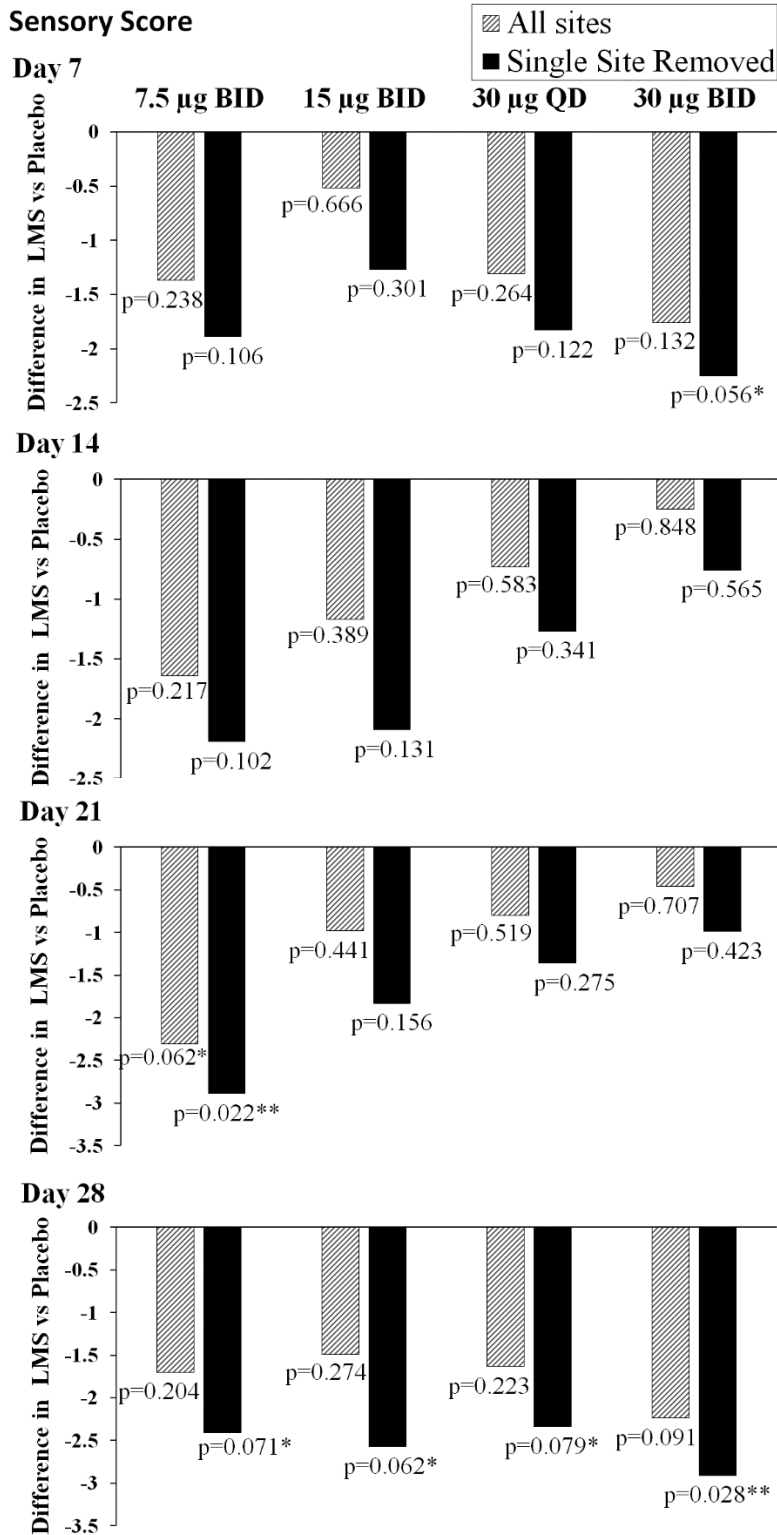

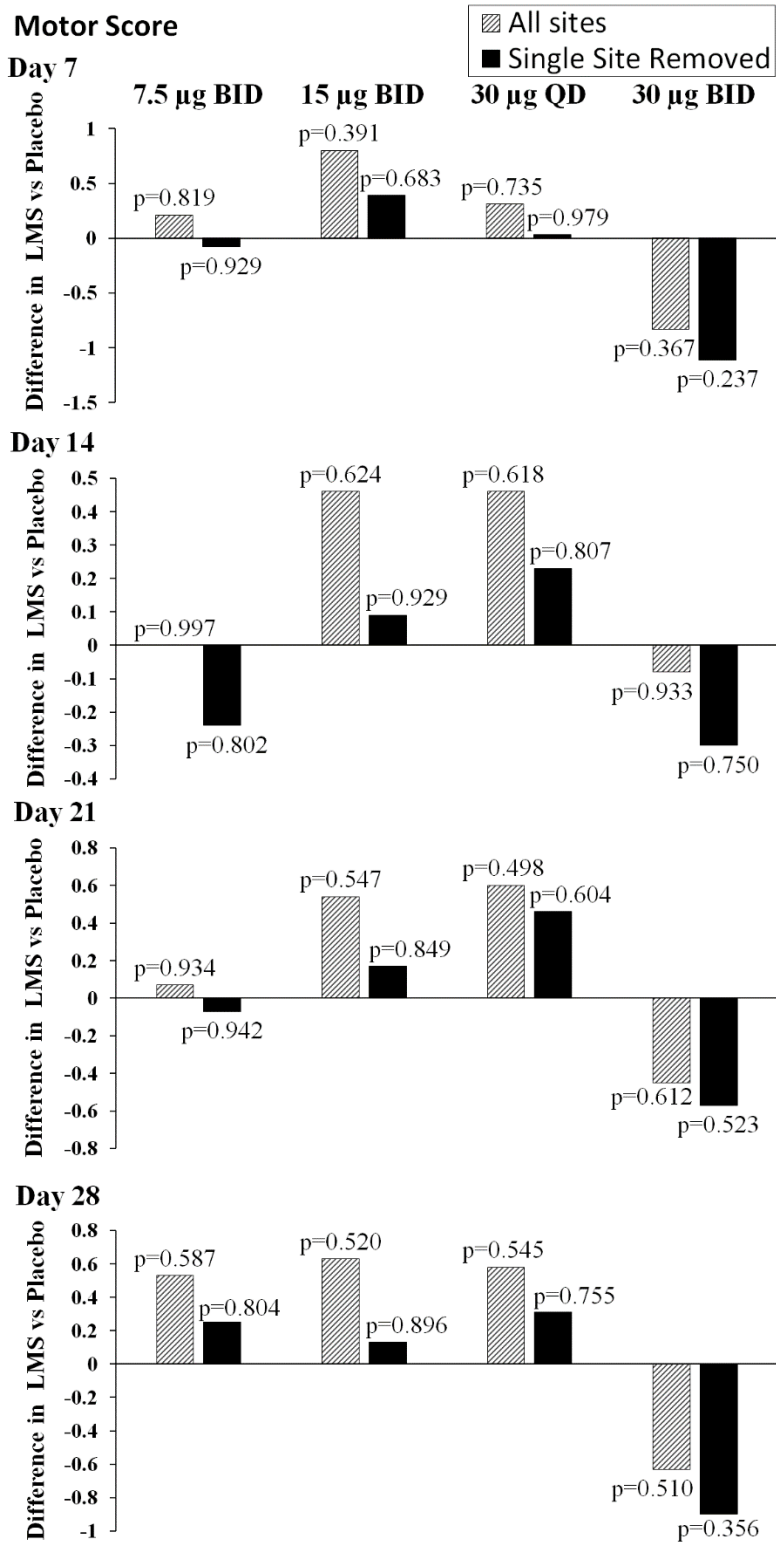

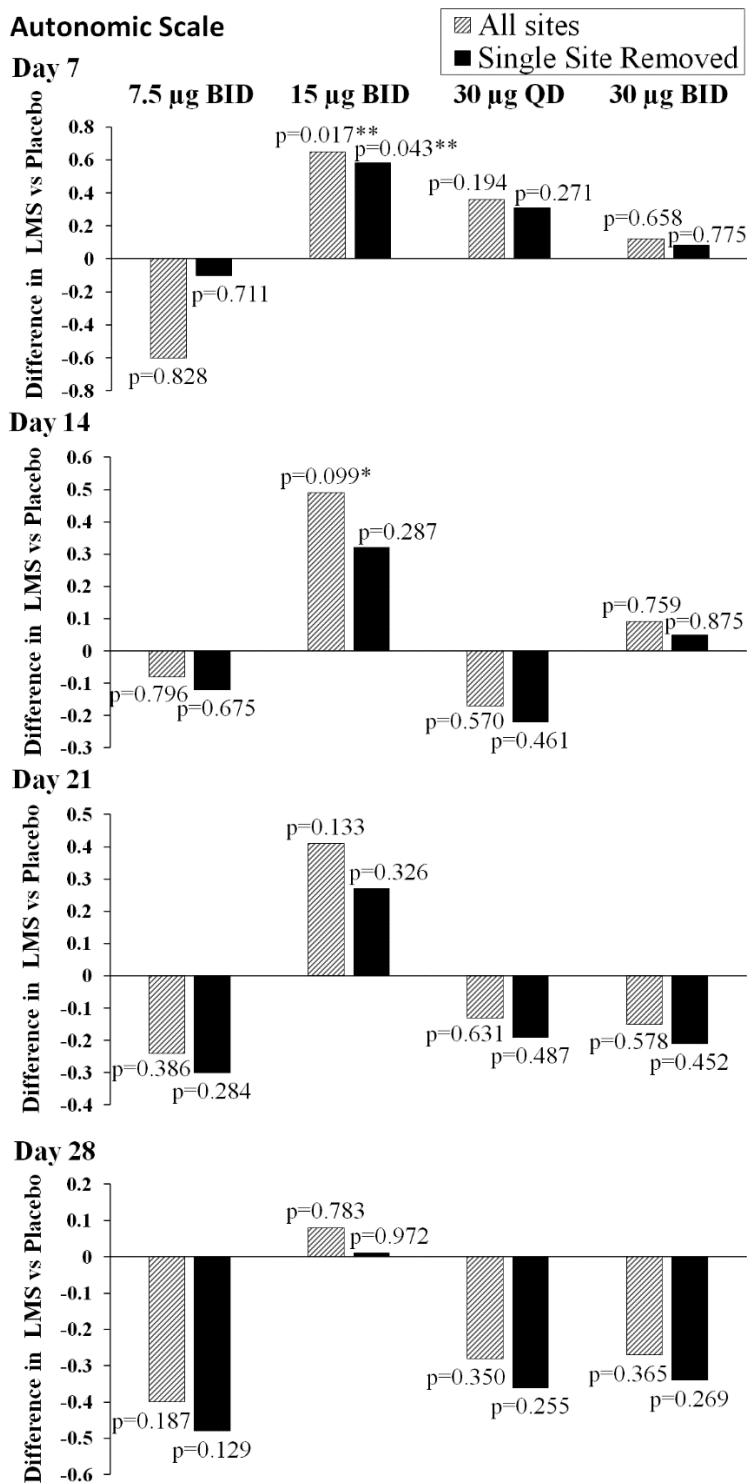

**Figure S2:** EORTC CIPN20 Secondary Outcome Measures. The least squares mean (LMS) differences (treatment – placebo) from baseline to Day 7, Day 14, Day 21, and Day 28 are shown. *P*-values for the difference in means are shown with \* indicates  $p < 0.1$ , \*\* indicates  $p < 0.05$ , and \*\*\* indicates  $p < 0.01$ .

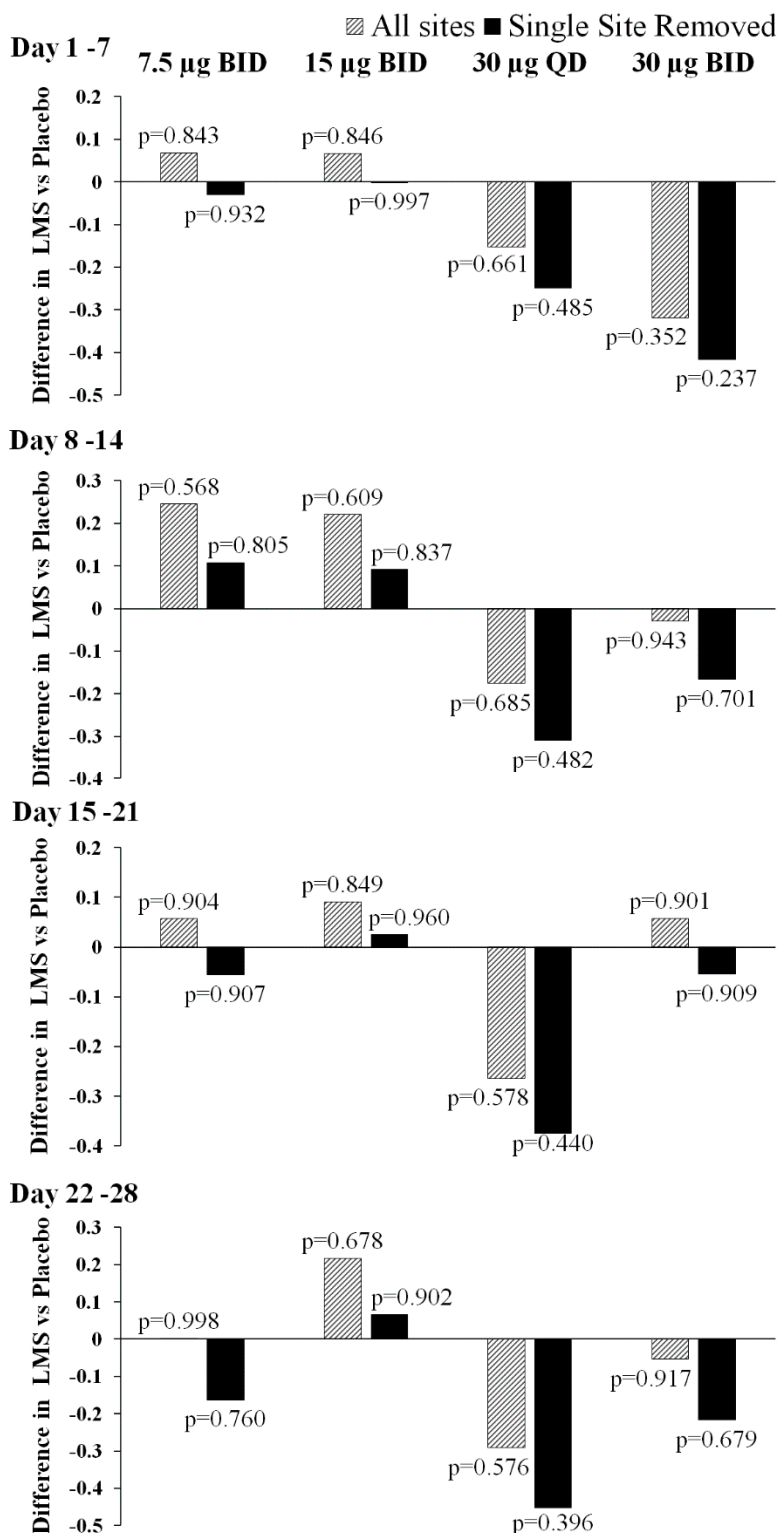

**Figure S3:** Numerical Pain Rating Scale (NPRS) Scores. The change from baseline in average least squares mean (LMS) differences (treatment – placebo) for each week are shown. P-values represent the significant difference from placebo.

**Table S1:** Patient Global Impression of Change (PGIC) at Day 28

| Since starting this study:                          | TTX Dosage                      |                                |                               |                                | Placebo<br>(N = 25)<br>n (%) |
|-----------------------------------------------------|---------------------------------|--------------------------------|-------------------------------|--------------------------------|------------------------------|
|                                                     | 7.5 µg BID<br>(N = 25)<br>n (%) | 15 µg BID<br>(N = 24)<br>n (%) | 30 µg QD<br>(N = 25)<br>n (%) | 30 µg BID<br>(N = 26)<br>n (%) |                              |
| <b>Overall QoL:</b>                                 |                                 |                                |                               |                                |                              |
| Very much worse                                     | 0                               | 0                              | 0                             | 0                              | 1 (4.0%)                     |
| Moderately worse                                    | 0                               | 0                              | 1 (4.0%)                      | 1 (3.8%)                       | 1 (4.0%)                     |
| A little worse                                      | 1 (4.0%)                        | 2 (8.3%)                       | 2 (8.0%)                      | 1 (3.8%)                       | 0                            |
| About the same                                      | 11 (44.0%)                      | 8 (33.3%)                      | 9 (36.0%)                     | 9 (34.6%)                      | 9 (36.0%)                    |
| A little better                                     | 5 (20.0%)                       | 5 (20.8%)                      | 2 (8.0%)                      | 2 (7.7%)                       | 5 (20.0%)                    |
| Moderately better                                   | 5 (20.0%)                       | 6 (25.0%)                      | 6 (24.0%)                     | 10 (38.5%)                     | 5 (20.0%)                    |
| Very much better                                    | 1 (4.0%)                        | 3 (12.5%)                      | 3 (12.0%)                     | 2 (7.7%)                       | 4 (16.0%)                    |
| <i>p</i> -value <sup>a</sup>                        | 0.148                           | 0.402                          | 0.927                         | 1.000                          |                              |
| <b>Physical Condition:</b>                          |                                 |                                |                               |                                |                              |
| Very much worse                                     | 0                               | 0                              | 0                             | 0                              | 0                            |
| Moderately worse                                    | 0                               | 1 (4.2%)                       | 1 (4.0%)                      | 0                              | 2 (8.0%)                     |
| A little worse                                      | 1 (4.0%)                        | 1 (4.2%)                       | 1 (4.0%)                      | 2 (7.7%)                       | 0                            |
| About the same                                      | 13 (52.0%)                      | 8 (33.3%)                      | 10 (40.0%)                    | 8 (30.8%)                      | 11 (44.0%)                   |
| A little better                                     | 3 (12.0%)                       | 8 (33.3%)                      | 3 (12.0%)                     | 5 (19.2%)                      | 5 (20.0%)                    |
| Moderately better                                   | 5 (20.0%)                       | 4 (16.7%)                      | 5 (20.0%)                     | 9 (34.6%)                      | 3 (12.0%)                    |
| Very much better                                    | 1 (4.0%)                        | 2 (8.3%)                       | 3 (12.0%)                     | 1 (3.8%)                       | 4 (16.0%)                    |
| <i>p</i> -value <sup>a</sup>                        | 0.433                           | 0.219                          | 0.943                         | 0.385                          |                              |
| <b>Emotional State:</b>                             |                                 |                                |                               |                                |                              |
| Very much worse                                     | 0                               | 1 (4.2%)                       | 1 (4.0%)                      | 0                              | 0                            |
| Moderately worse                                    | 0                               | 0                              | 0                             | 1 (3.8%)                       | 0                            |
| A little worse                                      | 0                               | 0                              | 1 (4.0%)                      | 0                              | 4 (16.0%)                    |
| About the same                                      | 17 (68.0%)                      | 15 (62.5%)                     | 14 (56.0%)                    | 12 (46.2%)                     | 11 (44.0%)                   |
| A little better                                     | 3 (12.0%)                       | 5 (20.8%)                      | 2 (8.0%)                      | 4 (15.4%)                      | 4 (16.0%)                    |
| Moderately better                                   | 2 (8.0%)                        | 2 (8.3%)                       | 4 (16.0%)                     | 3 (11.5%)                      | 2 (8.0%)                     |
| Very much better                                    | 1 (4.0%)                        | 1 (4.2%)                       | 1 (4.0%)                      | 5 (19.2%)                      | 4 (16.0%)                    |
| <i>p</i> -value <sup>a</sup>                        | 0.982                           | 0.898                          | 0.451                         | 0.370                          |                              |
| <b>Enjoy Social Life:</b>                           |                                 |                                |                               |                                |                              |
| Very much worse                                     | 0                               | 0                              | 0                             | 0                              | 0                            |
| Moderately worse                                    | 0                               | 0                              | 0                             | 0                              | 1 (4.0%)                     |
| A little worse                                      | 0                               | 0                              | 0                             | 1 (3.8%)                       | 1 (4.0%)                     |
| About the same                                      | 16 (64.0%)                      | 15 (62.5%)                     | 15 (60.0%)                    | 12 (46.2%)                     | 12 (48.0%)                   |
| A little better                                     | 2 (8.0%)                        | 5 (20.8%)                      | 3 (12.0%)                     | 3 (11.5%)                      | 4 (16.0%)                    |
| Moderately better                                   | 4 (16.0%)                       | 3 (12.5%)                      | 3 (12.0%)                     | 5 (19.2%)                      | 3 (12.0%)                    |
| Very much better                                    | 1 (4.0%)                        | 1 (4.2%)                       | 2 (8.0%)                      | 4 (15.4%)                      | 4 (16.0%)                    |
| <i>p</i> -value <sup>a</sup>                        | 0.612                           | 0.218                          | 0.636                         | 0.849                          |                              |
| <b>Numbness, Tingling or Pain in Hands or Feet:</b> |                                 |                                |                               |                                |                              |
| Very much worse                                     | 0                               | 0                              | 1 (4.0%)                      | 1 (3.8%)                       | 1 (4.0%)                     |
| Moderately worse                                    | 0                               | 1 (4.2%)                       | 2 (8.0%)                      | 1 (3.8%)                       | 2 (8.0%)                     |
| A little worse                                      | 1 (4.0%)                        | 2 (8.3%)                       | 1 (4.0%)                      | 3 (11.5%)                      | 0                            |
| About the same                                      | 10 (40.0%)                      | 8 (33.3%)                      | 8 (32.0%)                     | 6 (23.1%)                      | 9 (36.0%)                    |



|                                        |            |            |            |            |            |
|----------------------------------------|------------|------------|------------|------------|------------|
| A little better                        | 4 (16.0%)  | 7 (29.2%)  | 3 (12.0%)  | 5 (19.2%)  | 7 (28.0%)  |
| Moderately better                      | 6 (24.0%)  | 6 (25.0%)  | 3 (12.0%)  | 6 (23.1%)  | 2 (8.0%)   |
| Very much better                       | 2 (8.0%)   | 0          | 5 (20.0%)  | 3 (11.5%)  | 4 (16.0%)  |
| <i>p</i> -value <sup>a</sup>           | 0.691      | 0.165      | 0.342      | 1.000      |            |
| <b>Believe Receiving Active Agent:</b> |            |            |            |            |            |
| Yes                                    | 15 (60.0%) | 15 (62.5%) | 14 (56.0%) | 22 (84.6%) | 13 (52.0%) |
| No                                     | 8 (32.0%)  | 9 (37.5%)  | 8 (32.0%)  | 3 (11.5%)  | 12 (48.0%) |

QoL: quality of life; BID: twice daily; QD: once daily; *n*: number of subjects. <sup>a</sup> Nominal *p*-values were obtained from Cochran-Mantel-Haenszel tests for comparing difference between active treatment and placebo cohorts.

**Table S2:** Study Adverse Events

| System Organ Class<br>Preferred Term | TTX<br>7.5 µg BID<br>(N = 25)<br><i>n</i> (%)    |  | TTX<br>15 µg BID<br>(N = 24)<br><i>n</i> (%)                      |  | TTX<br>30 µg QD<br>(N = 25)<br><i>n</i> (%)                         |  | TTX<br>30 µg BID<br>(N = 26)<br><i>n</i> (%)                                       |  | Placebo<br>(N = 25)<br><i>n</i> (%)                                             |  |
|--------------------------------------|--------------------------------------------------|--|-------------------------------------------------------------------|--|---------------------------------------------------------------------|--|------------------------------------------------------------------------------------|--|---------------------------------------------------------------------------------|--|
| Number of Subjects<br>with ≥1 AE     | 21 (84.0%)                                       |  | 22 (91.7%)                                                        |  | 20 (80.0%)                                                          |  | 24 (92.3%)                                                                         |  | 18 (72.0%)                                                                      |  |
| <b>Nervous system disorders</b>      |                                                  |  |                                                                   |  |                                                                     |  |                                                                                    |  |                                                                                 |  |
| Paraesthesia oral                    | 4 (16.0%)<br>3× Mild<br>1× Moderate              |  | 9 (37.5%)<br>8× Mild<br>1× Moderate                               |  | 10 (40.0%)<br>10× Mild<br>7× Related                                |  | 11 (42.3%)<br>11× Mild<br>2× Not Related<br>5× Possibly<br>4× Related              |  | 3 (12.0%)<br>3× Mild<br>2× Possibly<br>1× Related                               |  |
| Hypoaesthesia oral                   | 5 (20.0%)<br>4× Mild<br>1× Moderate              |  | 7 (29.2%)<br>6× Mild<br>1× Moderate                               |  | 6 (24.0%)<br>6× Mild<br>3× Related                                  |  | 10 (38.5%)<br>9× Mild<br>1× Moderate<br>3× Possibly<br>6× Related                  |  | 3 (12.0%)<br>3× Mild<br>2× Possibly<br>1× Related                               |  |
| Paraesthesia                         | 5 (20.0%)<br>4× Mild<br>1× Moderate              |  | 7 (29.2%)<br>6× Mild<br>1× Moderate                               |  | 5 (20.0%)<br>5× Mild<br>1× Not Related<br>4× Related                |  | 7 (26.9%)<br>6× Mild<br>1× Severe<br>3× Possibly<br>3× Related                     |  | 6 (24.0%)<br>5× Mild<br>1× Moderate<br>4× Possibly<br>1× Related                |  |
| Headache                             | 6 (24.0%)<br>5× Mild<br>1× Moderate              |  | 3 (12.5%)<br>3 × Mild<br>1× Unlikely<br>1× Possibly<br>1× Related |  | 1 (4.0%)<br>1× Mild<br>1× Not Related                               |  | 9 (34.6%)<br>8× Mild<br>1× Moderate<br>4× Not Related<br>2× Possibly<br>3× Related |  | 5 (20.0%)<br>4× Mild<br>1× Moderate<br>4× Possibly<br>1× Related                |  |
| Dizziness                            | 3 (12.0%)<br>3× Mild<br>3× Possibly              |  | 4 (16.7%)<br>4× Mild<br>4× Possibly                               |  | 3 (12.0%)<br>3× Mild<br>1× Not Related<br>1× Possibly<br>1× Related |  | 8 (30.8%)<br>8× Mild<br>1× Not Related<br>4× Possibly<br>3× Related                |  | 5 (20.0%)<br>4× Mild<br>1× Moderate<br>1× Unlikely<br>2× Possibly<br>1× Related |  |
| Hypoaesthesia                        | 2 (8.0%)<br>1× Mild<br>2× Related<br>1× Moderate |  | 1 (4.2%)<br>1× Mild<br>1× Possibly                                |  | 2 (8.0%)<br>1× Mild<br>2× Related<br>1× Moderate                    |  | 1 (3.8%)<br>1× Mild<br>1× Possibly                                                 |  | 2 (8.0%)<br>1× Mild<br>2× Not Related<br>1× Moderate                            |  |
| Dysgeusia                            | 2 (8.0%)                                         |  | 0                                                                 |  | 2 (8.0%)                                                            |  | 3 (11.5%)                                                                          |  | 0                                                                               |  |

|                               |                         |                |                     |             |                     |                               |                                  |                                             |                     |             |
|-------------------------------|-------------------------|----------------|---------------------|-------------|---------------------|-------------------------------|----------------------------------|---------------------------------------------|---------------------|-------------|
|                               | 2× Mild                 | 2× Related     |                     |             | 2× Mild             | 1× Not Related<br>1× Possibly | 3× Mild                          | 1× Not Related<br>1× Possibly<br>1× Related |                     |             |
| Burning sensation             | 0                       |                | 1 (4.2%)<br>1× Mild | 1× Possibly | 1 (4.0%)<br>1× Mild | 1× Possibly                   | 2 (7.7%)<br>1× Mild<br>1× Severe | 1× Possibly<br>1× Related                   | 2 (8.0%)<br>2× Mild | 2× Possibly |
| Hypoaesthesia facial          | 1 (4.0%)<br>1× Mild     | 1× Related     | 1 (4.2%)<br>1× Mild | 1× Possibly | 2 (8.0%)<br>2× Mild | 1× Possibly<br>1× Related     | 0                                |                                             | 1 (4.0%)<br>1× Mild | 1× Possibly |
| Oral dysaesthesia             | 1 (4.0%)<br>1× Mild     | 1× Related     | 1 (4.2%)<br>1× Mild | 1× Related  | 1 (4.0%)<br>1× Mild | 1× Related                    | 2 (7.7%)<br>2× Mild              | 2× Not Related                              | 0                   |             |
| Somnolence                    | 1 (4.0%)<br>1× Mild     | 3× Possibly    | 0                   |             | 0                   |                               | 1 (3.8%)<br>1× Mild              | 1× Related                                  | 2 (8.0%)<br>2× Mild | 2× Possibly |
| Hyperaesthesia                | 1 (4.0%)<br>1× Moderate | 1× Related     | 0                   |             | 0                   |                               | 1 (3.8%)<br>1× Mild              | 1× Possibly                                 | 1 (4.0%)<br>1× Mild | 1× Related  |
| Neuropathy peripheral         | 0                       |                | 1 (4.2%)<br>1× Mild | 1× Related  | 0                   |                               | 2 (7.7%)<br>2× Moderate          | 1× Not Related<br>1× Related                | 0                   |             |
| Pharyngeal hypoaesthesia      | 1 (4.0%)<br>1× Mild     | 1× Related     | 0                   |             | 1 (4.0%)<br>1× Mild | 1× Related                    | 1 (3.8%)<br>1× Mild              | 1× Not Related                              | 0                   |             |
| Hypoaesthesia teeth           | 0                       |                | 0                   |             | 0                   |                               | 2 (7.7%)<br>2× Mild              | 2× Possibly                                 | 0                   |             |
| Neuralgia                     | 1 (4.0%)<br>1× Mild     | 1× Not Related | 0                   |             | 0                   |                               | 1 (3.8%)<br>1× Moderate          | 1× Related                                  | 0                   |             |
| Peripheral sensory neuropathy | 0                       |                | 0                   |             | 1 (4.0%)            |                               | 1 (3.8%)                         |                                             | 0                   |             |
|                               |                         |                |                     |             | 1× Moderate         | 1× Not Related                | 1× Moderate                      | 1× Related                                  |                     |             |
| Sensory disturbance           | 0                       |                | 1 (4.2%)<br>1× Mild | 1× Unlikely | 0                   |                               | 0                                |                                             | 1 (4.0%)<br>1× Mild | 1× Possibly |

|                                                             |             |             |                |                |             |                |             |                |                |
|-------------------------------------------------------------|-------------|-------------|----------------|----------------|-------------|----------------|-------------|----------------|----------------|
| Amnesia                                                     | 0           | 0           | 1 (4.0%)       | 0              | 0           | 0              | 0           | 0              | 0              |
|                                                             |             |             | 1× Mild        | 1× Not Related |             |                |             |                |                |
| Ataxia                                                      | 0           | 0           | 0              | 1 (3.8%)       | 0           | 0              | 0           | 0              | 0              |
|                                                             |             |             |                | 1× Moderate    | 1× Related  |                |             |                |                |
| Dysaesthesia                                                | 0           | 0           | 1 (4.0%)       | 0              | 0           | 0              | 0           | 0              | 0              |
|                                                             |             |             | 1× Mild        | 1× Related     |             |                |             |                |                |
| Dyscalculia                                                 | 0           | 0           | 1 (4.0%)       | 0              | 0           | 0              | 0           | 0              | 0              |
|                                                             |             |             | 1× Mild        | 1× Not Related |             |                |             |                |                |
| Head discomfort                                             | 0           | 0           | 0              | 1 (3.8%)       | 0           | 0              | 0           | 0              | 0              |
|                                                             |             |             |                | 1× Mild        | 1× Related  |                |             |                |                |
| Hypersomnia                                                 | 0           | 0           | 0              | 1 (3.8%)       | 0           | 0              | 0           | 0              | 0              |
|                                                             |             |             |                | 1× Moderate    | 1× Unlikely |                |             |                |                |
| Hyporeflexia                                                | 0           | 0           | 0              | 0              | 0           | 0              | 0           | 1 (4.0%)       | 0              |
|                                                             |             |             |                |                |             |                |             | 1× Mild        | 1× Possibly    |
| Lethargy                                                    | 0           | 0           | 0              | 0              | 0           | 0              | 0           | 1 (4.0%)       | 0              |
|                                                             |             |             |                |                |             |                |             | 1× Moderate    | 1× Possibly    |
| Motor dysfunction                                           | 0           | 1 (4.2%)    | 0              | 0              | 0           | 0              | 0           | 0              | 0              |
|                                                             |             | 1× Mild     | 1× Possibly    |                |             |                |             |                |                |
| Post-traumatic headache                                     | 0           | 1 (4.2%)    | 0              | 0              | 0           | 0              | 0           | 0              | 0              |
|                                                             |             | 1× Mild     | 1× Not Related |                |             |                |             |                |                |
| <b>General disorders and administration site conditions</b> |             |             |                |                |             |                |             |                |                |
| Fatigue                                                     | 4 (16.0%)   | 5 (20.8%)   | 5 (20.0%)      | 3 (11.5%)      | 4 (16.0%)   | 0              | 0           | 0              | 0              |
|                                                             | 4× Mild     | 1× Unlikely | 4× Mild        | 1× Not Related | 5× Mild     | 3× Not Related | 3× Mild     | 1× Not Related | 3× Mild        |
|                                                             |             | 1× Possibly | 1× Moderate    | 3× Possibly    |             | 1× Unlikely    |             | 1× Unlikely    | 1× Moderate    |
|                                                             |             | 2× Related  |                | 1× Related     |             | 1× Possibly    |             | 1× Possibly    | 2× Possibly    |
| Feeling hot                                                 | 1 (4.0%)    | 1 (4.2%)    | 1 (4.0%)       | 2 (7.7%)       | 2 (8.0%)    | 0              | 0           | 0              | 0              |
|                                                             | 1× Mild     | 1× Related  | 1× Mild        | 1× Possibly    | 1× Mild     | 1× Possibly    | 2× Mild     | 1× Related     | 2× Mild        |
|                                                             |             |             |                |                |             |                |             | 1× Related     | 2× Possibly    |
|                                                             |             |             |                |                |             |                |             | 1× Possibly    |                |
| Pain                                                        | 1 (4.0%)    | 2 (8.3%)    | 1 (4.0%)       | 1 (3.8%)       | 1 (4.0%)    | 0              | 0           | 0              | 0              |
|                                                             | 1× Moderate | 1× Related  | 2× Mild        | 1× Unlikely    | 1× Moderate | 1× Not Related | 1× Severe   | 1× Related     | 1× Mild        |
|                                                             |             |             |                | 1× Possibly    |             |                |             |                | 1× Not Related |
| Feeling abnormal                                            | 0           | 1 (4.2%)    | 2 (8.0%)       | 1 (3.8%)       | 1 (4.0%)    | 0              | 0           | 0              | 0              |
|                                                             |             | 1× Mild     | 1× Possibly    | 2× Mild        | 2× Related  | 1× Mild        | 1× Possibly | 1× Mild        | 1× Possibly    |
| Injection site pain                                         | 2 (8.0%)    | 2 (8.3%)    | 0              | 1 (3.8%)       | 0           | 0              | 0           | 0              | 0              |

|                                   |             |                |             |                |          |             |                |             |             |                |
|-----------------------------------|-------------|----------------|-------------|----------------|----------|-------------|----------------|-------------|-------------|----------------|
|                                   | 2× Mild     | 2× Possibly    | 2× Mild     | 2× Possibly    |          | 1× Mild     | 1× Possibly    |             |             |                |
| Feeling drunk                     | 1 (4.0%)    |                | 1 (4.2%)    |                | 0        | 1 (3.8%)    |                | 1 (4.0%)    |             |                |
|                                   | 1× Mild     | 1× Possibly    | 1× Mild     | 1× Related     |          | 1× Mild     | 1× Related     | 1× Mild     | 1× Possibly |                |
| Oedema peripheral                 | 1 (4.0%)    |                | 1 (4.2%)    |                | 0        | 1 (3.8%)    |                | 1 (4.0%)    |             |                |
|                                   | 1× Mild     | 1× Not Related | 1× Mild     | 1× Possibly    |          | 1× Mild     | 1× Not Related | 1× Mild     | 1× Possibly |                |
| Chest discomfort                  | 0           |                | 1 (4.2%)    |                | 1 (4.0%) | 0           |                | 0           |             |                |
|                                   |             |                | 1× Mild     | 1× Related     | 1× Mild  | 1× Related  |                |             |             |                |
| Influenza like illness            | 0           |                | 0           |                | 0        | 2 (7.7%)    |                | 0           |             |                |
|                                   |             |                |             |                |          | 1× Mild     | 1× Not Related |             |             |                |
|                                   |             |                |             |                |          | 1× Moderate | 1× Possibly    |             |             |                |
| Facial pain                       | 0           |                | 0           |                | 0        | 0           |                | 1 (4.0%)    |             |                |
|                                   |             |                |             |                |          |             |                | 1× Mild     | 1× Possibly |                |
| Feeling cold                      | 1 (4.0%)    |                | 0           |                | 0        | 0           |                | 0           |             |                |
|                                   | 1× Mild     | 1× Possibly    |             |                |          |             |                |             |             |                |
| Gait disturbance                  | 1 (4.0%)    |                | 0           |                | 0        | 0           |                | 0           |             |                |
|                                   | 1× Mild     | 1× Possibly    |             |                |          |             |                |             |             |                |
| Injection site erythema           | 1 (4.0%)    |                | 0           |                | 0        | 0           |                | 0           |             |                |
|                                   | 1× Mild     | 1× Possibly    |             |                |          |             |                |             |             |                |
| Local swelling                    | 0           |                | 0           |                | 0        | 1 (3.8%)    |                | 0           |             |                |
|                                   |             |                |             |                |          | 1× Mild     | 1× Not Related |             |             |                |
| Therapeutic response unexpected   | 0           |                | 0           |                | 0        | 1 (3.8%)    |                | 0           |             |                |
|                                   |             |                |             |                |          | 1× Mild     | 1× Possibly    |             |             |                |
| <b>Gastrointestinal disorders</b> |             |                |             |                |          |             |                |             |             |                |
| Nausea                            | 1 (4.0%)    |                | 5 (20.8%)   |                | 1 (4.0%) | 6 (23.1%)   |                | 6 (24.0%)   |             |                |
|                                   | 1× Moderate | 1× Possibly    | 3× Mild     | 1× Not Related | 1× Mild  | 1× Possibly | 4× Mild        | 1× Unlikely | 5× Mild     | 1× Not Related |
|                                   |             |                | 2× Moderate | 3× Possibly    |          |             | 2× Moderate    | 3× Possibly | 1× Moderate | 1× Unlikely    |
|                                   |             |                |             | 1× Related     |          |             |                | 2× Related  |             | 3× Possibly    |
|                                   |             |                |             |                |          |             |                |             |             | 1× Related     |
| Diarrhoea                         | 2 (8.0%)    |                | 1 (4.2%)    |                | 0        | 2 (7.7%)    |                | 0           |             |                |
|                                   | 2× Mild     | 1× Unlikely    | 1× Mild     | 1× Not Related |          | 1× Mild     | 1× Unlikely    |             |             |                |
|                                   |             | 1× Possibly    |             |                |          | 1× Moderate | 1× Related     |             |             |                |

|                                                        |             |                |             |                |          |                |             |                |             |                |
|--------------------------------------------------------|-------------|----------------|-------------|----------------|----------|----------------|-------------|----------------|-------------|----------------|
| Abdominal discomfort                                   | 1 (4.0%)    |                | 1 (4.2%)    |                | 0        |                | 1 (3.8%)    |                | 1 (4.0%)    |                |
|                                                        | 1× Mild     | 1× Not Related | 1× Moderate | 1× Not Related |          |                | 1× Mild     | 1× Possibly    | 1× Mild     | 1× Possibly    |
| Constipation                                           | 0           |                | 1 (4.2%)    |                | 1 (4.0%) |                | 1 (3.8%)    |                | 0           |                |
|                                                        |             |                | 1× Moderate | 1× Unlikely    | 1× Mild  | 1× Not Related | 1× Mild     | 1× Related     |             |                |
| Abdominal distension                                   | 1 (4.0%)    |                | 0           |                | 0        |                | 0           |                | 1 (4.0%)    |                |
|                                                        | 1× Moderate | 1× Not Related |             |                |          |                |             |                | 1× Mild     | 1× Unlikely    |
| Abdominal pain                                         | 1 (4.0%)    |                | 0           |                | 0        |                | 1 (3.8%)    |                | 0           |                |
|                                                        | 1× Mild     | 1× Unlikely    |             |                |          |                | 1× Mild     | 1× Not Related |             |                |
| Abdominal pain upper                                   | 1 (4.0%)    |                | 0           |                | 0        |                | 0           |                | 1 (4.0%)    |                |
|                                                        | 1× Mild     | 1× Possibly    |             |                |          |                |             |                | 1× Moderate | 1× Not Related |
| Lip swelling                                           | 0           |                | 0           |                | 0        |                | 1 (3.8%)    |                | 1 (4.0%)    |                |
|                                                        |             |                |             |                |          |                | 1× Mild     | 1× Not Related | 1× Mild     | 1× Possibly    |
| Tongue disorder                                        | 1 (4.0%)    |                | 0           |                | 1 (4.0%) |                | 0           |                | 0           |                |
|                                                        | 1× Mild     | 1× Related     |             |                | 1× Mild  | 1× Not Related |             |                |             |                |
| Vomiting                                               | 0           |                | 0           |                | 0        |                | 1 (3.8%)    |                | 1 (4.0%)    |                |
|                                                        |             |                |             |                |          |                | 1× Moderate | 1× Related     | 1× Mild     | 1× Unlikely    |
| Abdominal rigidity                                     | 1 (4.0%)    |                | 0           |                | 0        |                | 0           |                | 0           |                |
|                                                        | 1× Mild     | 1× Possibly    |             |                |          |                |             |                |             |                |
| Aphthous stomatitis                                    | 0           |                | 0           |                | 1 (4.0%) |                | 0           |                | 0           |                |
|                                                        |             |                |             |                | 1× Mild  | 1× Not Related |             |                |             |                |
| Dry mouth                                              | 0           |                | 0           |                | 0        |                | 1 (3.8%)    |                | 0           |                |
|                                                        |             |                |             |                |          |                | 1× Mild     | 1× Possibly    |             |                |
| Flatulence                                             | 1 (4.0%)    |                | 0           |                | 0        |                | 0           |                | 0           |                |
|                                                        | 1× Mild     | 1× Possibly    |             |                |          |                |             |                |             |                |
| Lip dry                                                | 0           |                | 1 (4.2%)    |                | 0        |                | 0           |                | 0           |                |
|                                                        |             |                | 1× Mild     | 1× Related     |          |                |             |                |             |                |
| Lip oedema                                             | 0           |                | 0           |                | 0        |                | 0           |                | 1 (4.0%)    |                |
|                                                        |             |                |             |                |          |                |             |                | 1× Mild     | 1× Possibly    |
| Salivary hypersecretion                                | 0           |                | 0           |                | 1 (4.0%) |                | 0           |                | 0           |                |
|                                                        |             |                |             |                | 1× Mild  | 1× Not Related |             |                |             |                |
| <b>Musculoskeletal and connective tissue disorders</b> |             |                |             |                |          |                |             |                |             |                |

|                           |                                        |  |                                                                           |  |                                                                              |  |                                                                            |  |                                                                |  |
|---------------------------|----------------------------------------|--|---------------------------------------------------------------------------|--|------------------------------------------------------------------------------|--|----------------------------------------------------------------------------|--|----------------------------------------------------------------|--|
| Pain in extremity         | 1 (4.0%)<br>1× Mild 1× Not Related     |  | 5 (20.8%)<br>4× Mild 1× Unlikely<br>1× Moderate 3× Possibly<br>1× Related |  | 4 (16.0%)<br>1× Mild 2× Not Related<br>3× Moderate 1× Possibly<br>1× Related |  | 3 (11.5%)<br>2× Mild 1× Not Related<br>1× Severe 1× Possibly<br>1× Related |  | 2 (8.0%)<br>1× Mild 1× Possibly<br>1× Moderate 1× Related      |  |
| Back pain                 | 2 (8.0%)<br>2× Moderate 2× Not Related |  | 1 (4.2%)<br>1× Mild 1× Not Related                                        |  | 1 (4.0%)<br>1× Moderate 1× Not Related                                       |  | 3 (11.5%)<br>2× Mild 2× Unlikely<br>1× Moderate 1× Not Related             |  | 3 (12.0%)<br>2× Mild 1× Unlikely<br>1× Moderate 2× Not Related |  |
| Arthralgia                | 1 (4.0%)<br>1× Mild 1× Not Related     |  | 1 (4.2%)<br>1× Moderate 1× Not Related                                    |  | 1 (4.0%)<br>1× Moderate 1× Not Related                                       |  | 2 (7.7%)<br>2× Mild 1× Not Related<br>1× Related                           |  | 2 (8.0%)<br>2× Mild 1× Unlikely<br>1× Related                  |  |
| Muscle spasms             | 0                                      |  | 1 (4.2%)<br>1× Mild 1× Not Related                                        |  | 0                                                                            |  | 2 (7.7%)<br>1× Mild 1× Not Related<br>1× Moderate 1× Related               |  | 1 (4.0%)<br>1× Mild 1× Related                                 |  |
| Musculoskeletal stiffness | 0                                      |  | 1 (4.2%)<br>1× Mild 1× Possibly                                           |  | 0                                                                            |  | 1 (3.8%)<br>1× Mild 1× Possibly                                            |  | 1 (4.0%)<br>1× Mild 1× Possibly                                |  |
| Myalgia                   | 1 (4.0%)<br>1× Moderate 1× Not Related |  | 0                                                                         |  | 0                                                                            |  | 0                                                                          |  | 1 (4.0%)<br>1× Mild 1× Possibly                                |  |
| Neck pain                 | 0                                      |  | 0                                                                         |  | 0                                                                            |  | 0                                                                          |  | 2 (8.0%)<br>2× Mild 1× not Related<br>1× Possibly              |  |
| Sensation of heaviness    | 0                                      |  | 0                                                                         |  | 0                                                                            |  | 1 (3.8%)<br>1× Mild 1× Unlikely                                            |  | 1 (4.0%)<br>1× Mild 1× Possibly                                |  |
| Flank pain                | 0                                      |  | 0                                                                         |  | 1 (4.0%)<br>1× Mild 1× Not Related                                           |  | 0                                                                          |  | 0                                                              |  |
| Joint stiffness           | 0                                      |  | 1 (4.2%)<br>1× Mild 1× Possibly                                           |  | 0                                                                            |  | 0                                                                          |  | 0                                                              |  |
| Limb discomfort           | 0                                      |  | 1 (4.2%)<br>1× Mild 1× Possibly                                           |  | 0                                                                            |  | 0                                                                          |  | 0                                                              |  |
| Muscle tightness          | 0                                      |  | 0                                                                         |  | 0                                                                            |  | 0                                                                          |  | 1 (4.0%)<br>1× Mild 1× Possibly                                |  |
| Muscle twitching          | 0                                      |  | 0                                                                         |  | 0                                                                            |  | 0                                                                          |  | 1 (4.0%)<br>1× Mild 1× Related                                 |  |



|                                                        |          |                |                |          |                |                |
|--------------------------------------------------------|----------|----------------|----------------|----------|----------------|----------------|
| Musculoskeletal chest pain                             | 0        | 1 (4.2%)       | 0              | 0        | 0              | 0              |
|                                                        |          | 1× Mild        | 1× Not Related |          |                |                |
| Musculoskeletal pain                                   | 0        | 0              | 0              | 0        | 0              | 1 (4.0%)       |
|                                                        |          |                |                |          |                | 1× Mild        |
|                                                        |          |                |                |          |                | 1× Not Related |
| Osteoarthritis                                         | 1 (4.0%) | 0              | 0              | 0        | 0              | 0              |
|                                                        | 1× Mild  | 1× Not Related |                |          |                |                |
| Pain in jaw                                            | 0        | 0              | 0              | 0        | 1 (3.8%)       | 0              |
|                                                        |          |                |                |          | 1× Moderate    | 1× Not Related |
| <b>Respiratory, thoracic and mediastinal disorders</b> |          |                |                |          |                |                |
| Cough                                                  | 1 (4.0%) | 0              | 0              | 0        | 1 (3.8%)       | 1 (4.0%)       |
|                                                        | 1× Mild  | 1× Not Related |                |          | 1× Moderate    | 1× Unlikely    |
|                                                        |          |                |                |          | 1× Moderate    | 1× Not Related |
| Oropharyngeal pain                                     | 1 (4.0%) | 0              | 0              | 1 (4.0%) | 0              | 1 (4.0%)       |
|                                                        | 1× Mild  | 1× Not Related |                | 1× Mild  | 1× Not Related | 1× Moderate    |
|                                                        |          |                |                |          |                | 1× Not Related |
| Rhinitis allergic                                      | 0        | 1 (4.2%)       | 0              | 1 (4.0%) | 0              | 0              |
|                                                        |          | 1× Moderate    | 1× Not Related | 1× Mild  | 1× Not Related | 1× Moderate    |
|                                                        |          |                |                |          | 1× Not Related |                |
| Dyspnoea                                               | 0        | 0              | 0              | 0        | 1 (3.8%)       | 1 (4.0%)       |
|                                                        |          |                |                |          | 1× Mild        | 1× Unlikely    |
|                                                        |          |                |                |          | 1× Mild        | 1× Not Related |
| Nasal congestion                                       | 0        | 0              | 0              | 0        | 1 (3.8%)       | 1 (4.0%)       |
|                                                        |          |                |                |          | 1× Moderate    | 1× Not Related |
|                                                        |          |                |                |          | 1× Mild        | 1× Not Related |
| Bronchial hyperreactivity                              | 0        | 0              | 0              | 0        | 1 (3.8%)       | 0              |
|                                                        |          |                |                |          | 1× Mild        | 1× Not Related |
| Chronic obstructive pulmonary disease                  | 0        | 0              | 0              | 0        | 1 (3.8%)       | 0              |
|                                                        |          |                |                |          | 1× Moderate    | 1× Unlikely    |
| Oropharyngeal discomfort                               | 0        | 0              | 0              | 0        | 0              | 1 (4.0%)       |
|                                                        |          |                |                |          |                | 1× Mild        |
|                                                        |          |                |                |          |                | 1× Related     |
| Pharyngeal oedema                                      | 0        | 0              | 0              | 1 (4.0%) | 0              | 0              |
|                                                        |          |                |                | 1× Mild  | 1× Possibly    |                |
| Rhinorrhoea                                            | 0        | 0              | 0              | 1 (4.0%) | 0              | 0              |
|                                                        |          |                |                | 1× Mild  | 1× Not Related |                |
| Sneezing                                               | 0        | 1 (4.2%)       | 0              | 0        | 0              | 0              |

|                                         |             |                |         |                |          |                    |                        |                            |
|-----------------------------------------|-------------|----------------|---------|----------------|----------|--------------------|------------------------|----------------------------|
| Throat tightness                        | 0           |                | 1× Mild | 1× Not Related | 1 (4.2%) | 0                  | 0                      | 0                          |
|                                         |             |                | 1× Mild | 1× Related     |          |                    |                        |                            |
| <b>Infections and infestations</b>      |             |                |         |                |          |                    |                        |                            |
| Urinary tract infection                 | 2 (8.0%)    |                |         |                | 0        | 1 (4.0%)           | 0                      | 1 (4.0%)                   |
|                                         | 2× Moderate | 2× Not Related |         |                |          | 1× Mild            | 1× Not Related         | 1× Moderate 1× Not Related |
| Nasopharyngitis                         | 1 (4.0%)    |                |         |                | 0        | 1 (4.0%)           | 0                      | 0                          |
|                                         | 1× Mild     | 1× Not Related |         |                |          | 1× Mild            | 1× Not Related         |                            |
| Upper respiratory tract infection       | 0           |                |         |                | 1 (4.2%) | 0                  | 0                      | 1 (4.0%)                   |
|                                         |             |                | 1× Mild | 1× Not Related |          |                    |                        | 1× Moderate 1× Not Related |
| Cystitis                                | 0           |                |         |                | 1 (4.2%) | 0                  | 0                      | 0                          |
|                                         |             |                | 1× Mild | 1× Not Related |          |                    |                        |                            |
| Influenza                               | 1 (4.0%)    |                |         |                | 0        | 0                  | 0                      | 0                          |
|                                         | 1× Moderate | 1× Not Related |         |                |          |                    |                        |                            |
| Oral herpes                             | 0           |                |         |                | 0        | 1 (4.0%)           | 0                      | 0                          |
|                                         |             |                |         |                |          | 1× Moderate        | 1× Not Related         |                            |
| Pharyngitis                             | 0           |                |         |                | 1 (4.2%) | 0                  | 0                      | 0                          |
|                                         |             |                | 1× Mild | 1× Not Related |          |                    |                        |                            |
| Pneumonia                               | 1 (4.0%)    |                |         |                | 0        | 0                  | 0                      | 0                          |
|                                         | 1× Moderate | 1× Not Related |         |                |          |                    |                        |                            |
| Viral upper respiratory tract infection | 0           |                |         |                | 0        | 0                  | 1 (3.8%)               | 0                          |
|                                         |             |                |         |                |          |                    | 1× Severe              | 1× Unlikely                |
| <b>Vascular disorders</b>               |             |                |         |                |          |                    |                        |                            |
| Hot flush                               | 1 (4.0%)    |                |         |                | 1 (4.2%) | 0                  | 2 (7.7%)               | 1 (4.0%)                   |
|                                         | 1× Mild     | 1× Related     | 1× Mild | 1× Related     |          |                    | 1× Mild 1× Not Related | 1× Mild 1× Possibly        |
|                                         |             |                |         |                |          |                    | 1× Moderate 1× Related |                            |
| Flushing                                | 0           |                |         |                | 0        | 2 (8.0%)           | 1 (3.8%)               | 1 (4.0%)                   |
|                                         |             |                |         |                |          | 2× Mild 2× Related | 1× Mild 1× Related     | 1× Mild 1× Possibly        |
| Hypertension                            | 0           |                |         |                | 0        | 0                  | 2 (7.7%)               | 0                          |
|                                         |             |                |         |                |          |                    | 1× Mild 2× Possibly    |                            |
|                                         |             |                |         |                |          |                    | 1× Severe              |                            |

|                                                       |             |                |                |             |                |                |
|-------------------------------------------------------|-------------|----------------|----------------|-------------|----------------|----------------|
| Intra-abdominal haematoma                             | 0           |                | 1 (4.2%)       | 0           | 0              | 0              |
|                                                       |             | 1× Mild        | 1× Possibly    |             |                |                |
| Peripheral coldness                                   | 0           |                | 0              | 0           | 1 (3.8%)       | 0              |
|                                                       |             |                |                |             | 1× Mild        | 1× Possibly    |
| <b>Skin and subcutaneous tissue disorders</b>         |             |                |                |             |                |                |
| Pruritus                                              | 3 (12.0%)   |                | 1 (4.2%)       | 0           | 0              | 0              |
|                                                       | 3× Mild     | 1× Possibly    | 1× Mild        | 1× Possibly |                |                |
|                                                       |             | 2× Related     |                |             |                |                |
| Hyperhidrosis                                         | 0           |                | 1 (4.2%)       | 0           | 0              | 1 (4.0%)       |
|                                                       |             |                |                |             |                | 1× Mild        |
|                                                       |             |                |                |             |                | 1× Unlikely    |
| Blister                                               | 0           |                | 0              | 0           | 1 (3.8%)       | 0              |
|                                                       |             |                |                |             | 1× Moderate    | 1× Not Related |
| Dry skin                                              | 0           |                | 0              | 1 (4.0%)    | 0              | 0              |
|                                                       |             |                |                | 1× Mild     | 1× Not Related |                |
| Erythema                                              | 0           |                | 0              | 0           | 0              | 1 (4.0%)       |
|                                                       |             |                |                |             |                | 1× Mild        |
|                                                       |             |                |                |             |                | 1× Possibly    |
| Rash                                                  | 0           |                | 1 (4.2%)       | 0           | 0              | 0              |
|                                                       |             | 1× Mild        | 1× Possibly    |             |                |                |
| Scar                                                  | 0           |                | 0              | 0           | 0              | 1 (4.0%)       |
|                                                       |             |                |                |             |                | 1× Mild        |
|                                                       |             |                |                |             |                | 1× Not Related |
| Skin discoloration                                    | 1 (4.0%)    |                | 0              | 0           | 0              | 0              |
|                                                       | 1× Mild     | 1× Possibly    |                |             |                |                |
| <b>Injury, poisoning and procedural complications</b> |             |                |                |             |                |                |
| Fall                                                  | 0           |                | 2 (8.3%)       | 0           | 0              | 1 (4.0%)       |
|                                                       |             | 2× Mild        | 2× Not Related |             |                | 1× Mild        |
|                                                       |             |                |                |             |                | 1× Not Related |
| Contusion                                             | 0           |                | 0              | 1 (4.0%)    | 0              | 0              |
|                                                       |             |                |                | 1× Mild     | 1× Not Related |                |
| Joint sprain                                          | 0           |                | 0              | 0           | 1 (3.8%)       | 0              |
|                                                       |             |                |                |             | 1× Mild        | 1× Not Related |
| Meniscus lesion                                       | 1 (4.0%)    |                | 0              | 0           | 0              | 0              |
|                                                       | 1× Mild     | 1× Not Related |                |             |                |                |
| Pelvic fracture                                       | 1 (4.0%)    |                | 0              | 0           | 0              | 0              |
|                                                       | 1× Moderate | 1× Not Related |                |             |                |                |

|                                    |             |                |                |                |                |                |                |                |
|------------------------------------|-------------|----------------|----------------|----------------|----------------|----------------|----------------|----------------|
| Post procedural discomfort         | 0           | 0              | 0              | 0              | 1 (3.8%)       | 0              |                |                |
|                                    |             |                |                |                | 1× Mild        | 1× Not Related |                |                |
| Procedural pain                    | 0           | 0              | 0              | 0              | 0              | 1 (4.0%)       | 1× Mild        | 1× Not Related |
| <b>Ear and labyrinth disorders</b> |             |                |                |                |                |                |                |                |
| Ear pain                           | 0           | 0              | 1 (4.0%)       | 1 (3.8%)       | 0              |                |                |                |
|                                    |             |                | 1× Mild        | 1× Not Related | 1× Mild        | 1× Not Related |                |                |
| Tinnitus                           | 0           | 0              | 0              | 1 (3.8%)       | 1 (4.0%)       |                |                |                |
|                                    |             |                |                | 1× Mild        | 1× Not Related | 1× Mild        | 1× Related     |                |
| Vertigo                            | 0           | 1 (4.2%)       | 0              | 1 (3.8%)       | 0              |                |                |                |
|                                    |             | 1× Moderate    | 1× Related     | 1× Moderate    | 1× Possibly    |                |                |                |
| Ear pruritus                       | 1 (4.0%)    | 0              | 0              | 0              | 0              | 0              |                |                |
|                                    | 1× Mild     | 1× Possibly    |                |                |                |                |                |                |
| <b>Psychiatric disorders</b>       |             |                |                |                |                |                |                |                |
| Thinking abnormal                  | 1 (4.0%)    | 1 (4.2%)       | 0              | 0              | 1 (4.0%)       |                |                |                |
|                                    | 1× Mild     | 1× Possibly    | 1× Mild        | 1× Possibly    | 1× Mild        | 1× Possibly    |                |                |
| Anxiety                            | 0           | 0              | 0              | 0              | 1 (4.0%)       |                |                |                |
|                                    |             |                |                |                | 1× Moderate    | 1× Possibly    |                |                |
| Hypervigilance                     | 1 (4.0%)    | 0              | 0              | 0              | 0              | 0              |                |                |
|                                    | 1× Moderate | 1× Not Related |                |                |                |                |                |                |
| Insomnia                           | 0           | 1 (4.2%)       | 0              | 0              | 0              | 0              |                |                |
|                                    |             | 1× Moderate    | 1× Not Related |                |                |                |                |                |
| Nightmare                          | 1 (4.0%)    | 0              | 0              | 0              | 0              | 0              |                |                |
|                                    | 1× Moderate | 1× Related     |                |                |                |                |                |                |
| <b>Eye disorders</b>               |             |                |                |                |                |                |                |                |
| Eye pain                           | 1 (4.0%)    | 1 (4.2%)       | 0              | 0              | 0              | 0              |                |                |
|                                    | 1× Mild     | 1× Possibly    | 1× Mild        | 1× Unlikely    |                |                |                |                |
| Vision blurred                     | 0           | 0              | 0              | 1 (3.8%)       | 1 (4.0%)       |                |                |                |
|                                    |             |                |                | 1× Mild        | 1× Related     | 1× Mild        | 1× Not Related |                |
| Abnormal sensation in eye          | 1 (4.0%)    | 0              | 0              | 0              | 0              | 0              |                |                |
|                                    | 1× Mild     | 1× Possibly    |                |                |                |                |                |                |
| Chalazion                          | 0           | 0              | 1 (4.0%)       | 0              | 0              | 0              |                |                |
|                                    |             |                | 1× Moderate    | 1× Not Related |                |                |                |                |

|                                                                            |          |                |                |                |            |                |
|----------------------------------------------------------------------------|----------|----------------|----------------|----------------|------------|----------------|
| Diplopia                                                                   | 0        | 0              | 0              | 1 (3.8%)       | 0          | 0              |
|                                                                            |          |                |                | 1× Mild        | 1× Related |                |
| <b>Investigations</b>                                                      |          |                |                |                |            |                |
| Body temperature increased                                                 | 0        | 0              | 1 (4.0%)       | 0              | 1 (4.0%)   |                |
|                                                                            |          |                | 1× Mild        | 1× Not Related | 1× Mild    | 1× Possibly    |
| Blood glucose increased                                                    | 0        | 0              | 1 (4.0%)       | 0              | 0          |                |
|                                                                            |          |                | 1× Mild        | 1× Not Related |            |                |
| Blood pressure increased                                                   | 0        | 0              | 1 (4.0%)       | 0              | 0          |                |
|                                                                            |          |                | 1× Mild        | 1× Possibly    |            |                |
| Electrocardiogram QT prolonged                                             | 0        | 0              | 1 (4.0%)       | 0              | 0          |                |
|                                                                            |          |                | 1× Mild        | 1× Possibly    |            |                |
| Weight increased                                                           | 0        | 0              | 0              | 0              | 1 (4.0%)   |                |
|                                                                            |          |                |                |                | 1× Mild    | 1× Unlikely    |
| <b>Renal and urinary disorders</b>                                         |          |                |                |                |            |                |
| Dysuria                                                                    | 0        | 1 (4.2%)       | 0              | 0              | 0          |                |
|                                                                            |          | 1× Moderate    | 1× Not Related |                |            |                |
| Pollakiuria                                                                | 0        | 1 (4.2%)       | 0              | 0              | 0          |                |
|                                                                            |          | 1× Moderate    | 1× Not Related |                |            |                |
| Renal pain                                                                 | 0        | 0              | 1 (4.0%)       | 0              | 0          |                |
|                                                                            |          |                | 1× Mild        | 1× Not Related |            |                |
| <b>Blood and lymphatic system disorders</b>                                |          |                |                |                |            |                |
| Lymphadenopathy                                                            | 0        | 0              | 1 (4.0%)       | 0              | 1 (4.0%)   |                |
|                                                                            |          |                | 1× Mild        | 1× Not Related | 1× Mild    | 1× Not Related |
| <b>Cardiac disorders</b>                                                   |          |                |                |                |            |                |
| Palpitations                                                               | 1 (4.0%) | 0              | 0              | 0              | 0          |                |
|                                                                            | 1× Mild  | 1× Not Related |                |                |            |                |
| Tachycardia                                                                | 0        | 0              | 0              | 0              | 1 (4.0%)   |                |
|                                                                            |          |                |                |                | 1× Mild    | 1× Unlikely    |
| <b>Neoplasms benign, malignant and unspecified (incl cysts and polyps)</b> |          |                |                |                |            |                |
| Colon cancer metastatic                                                    | 0        | 0              | 0              | 0              | 1 (4.0%)   |                |

|                                           |   |             |                |   |             |                |
|-------------------------------------------|---|-------------|----------------|---|-------------|----------------|
| Metastatic carcinoma of the bladder       | 0 | 1 (4.2%)    | 0              | 0 | 1× Moderate | 1× Not Related |
|                                           |   | 1× Death    | 1× Not Related |   |             |                |
| Prostate cancer                           | 0 | 1 (4.2%)    | 0              | 0 |             | 0              |
|                                           |   | 1× Death    | 1× Not Related |   |             |                |
| <b>Metabolism and nutrition disorders</b> |   |             |                |   |             |                |
| Decreased appetite                        | 0 | 1 (4.2%)    | 0              | 0 |             | 0              |
|                                           |   | 1× Moderate | 1× Not Related |   |             |                |

TTX: tetrodotoxin; QoL: quality of life; BID: twice daily; QD: once daily; *n*: number of subjects
